# Supplementary figures and images for: Genomic Sequence Resource of Talaromyces albobiverticillius, the Causative Pathogen of Pomegranate Pulp Rot Disease
Source: MDPI journal article supplement (doi:10.3390/jof9090909), 2023-09-07

# BUSCO Assessment Results

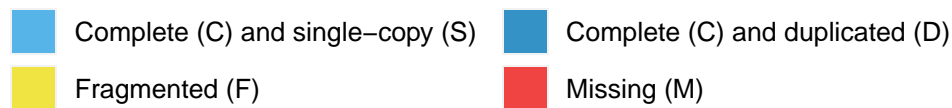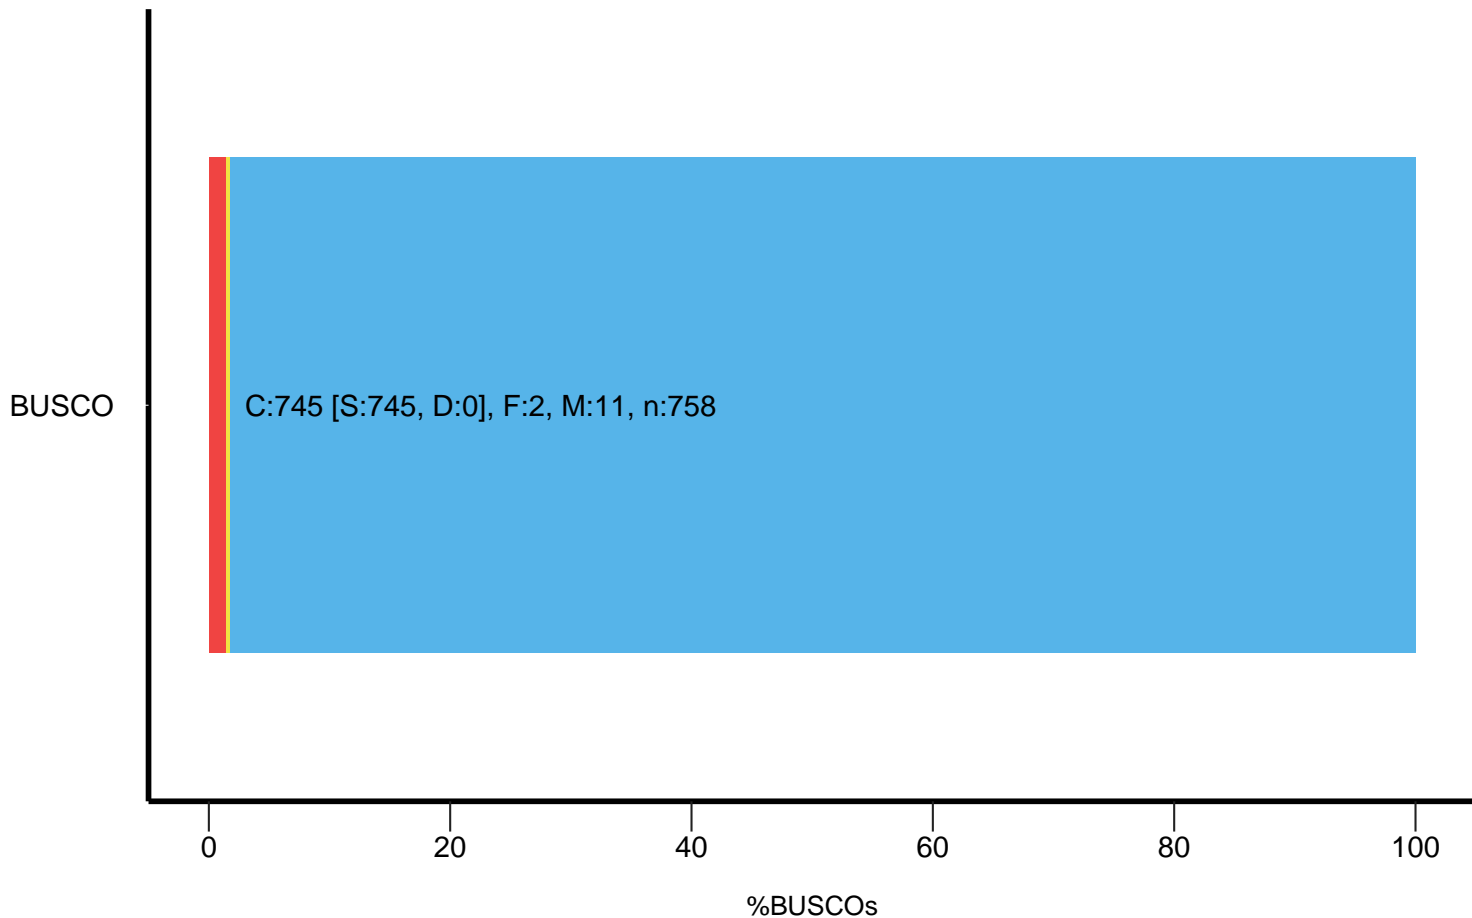

Supplement: s1 [file s1]
